# Supplementary material
Source: publisher figshare collection journal article supplement (https://karger.figshare.com/ndownloader/files/35916206)
Supplement: Supplementary file 1 [file 35916206]

**Supplement Table 3.** Associations between the thickness of ganglion cell layer by each ETDRS sector with gender, age (per decade), and axial length

| **ETDRS Sector** | **Male vs female** | | | **Age (per decade), year** | | | **Axial length, (mm)** | | |
| --- | --- | --- | --- | --- | --- | --- | --- | --- | --- |
| Coefficient | 95% CI | P Value | Coefficient | 95% CI | P Value | Coefficient | 95% CI | P Value | |
| **Central area** | 0.64 | -0.07,  1.35 | 0.077 | -0.09 | -0.31,  0.13 | 0.409 | 0.90 | 0.47,  1.34 | <0.001 | |
| **Inner ring** | |  |  |  |  |  |  |  |  | |
| Inner superior | 1.49 | 0.63,  2.34 | 0.001 | -0.65 | -0.91,  -0.38 | <0.001 | 0.50 | -0.02,  1.03 | 0.060 | |
| Inner nasal | 1.52 | 0.52,  2.53 | 0.003 | -0.63 | -0.94,  -0.31 | <0.001 | 1.11 | 0.48,  1.72 | 0.001 | |
| Inner inferior | 1.78 | 0.79,  2.77 | <0.001 | -0.72 | -1.03,  -0.41 | <0.001 | 0.69 | 0.08,  1.30 | 0.027 | |
| Inner temporal | 1.34 | 0.39,  2.28 | 0.006 | -0.55 | -0.84,  -0.26 | <0.001 | 1.30 | 0.71,  1.88 | <0.001 | |
| **Outer ring** | |  |  |  |  |  |  |  |  | |
| Outer superior | 0.98 | 0.29,  1.68 | 0.006 | -0.53 | -0.75,  -0.32 | <0.001 | -0.62 | -1.05,  -0.19 | 0.005 | |
| Outer nasal | 0.43 | -0.20,  1.06 | 0.183 | -0.45 | -0.65,  -0.26 | <0.001 | -0.62 | -1.01,  -0.23 | 0.002 | |
| Outer inferior | 0.62 | -0.10,  1.34 | 0.089 | -0.49 | -0.71,  -0.26 | <0.001 | -0.94 | -1.39,  -0.50 | <0.001 | |
| Outer temporal | 1.55 | 0.80,  2.29 | <0.001 | -0.01 | -0.01,  -0.007 | <0.001 | -0.69 | -1.15,  -0.23 | 0.004 | |
| *Note: CI = confidence interval, mm = millimeter* | | | | | | | | | |
